# Supplementary material for: (Pro)renin receptor accelerates development of sarcopenia via activation of Wnt/YAP signaling axis
Source: PubMed Central journal article supplement (PMC6718617; doi:10.1111/acel.12991), 2019-07-08

# Supporting Information Figure S1

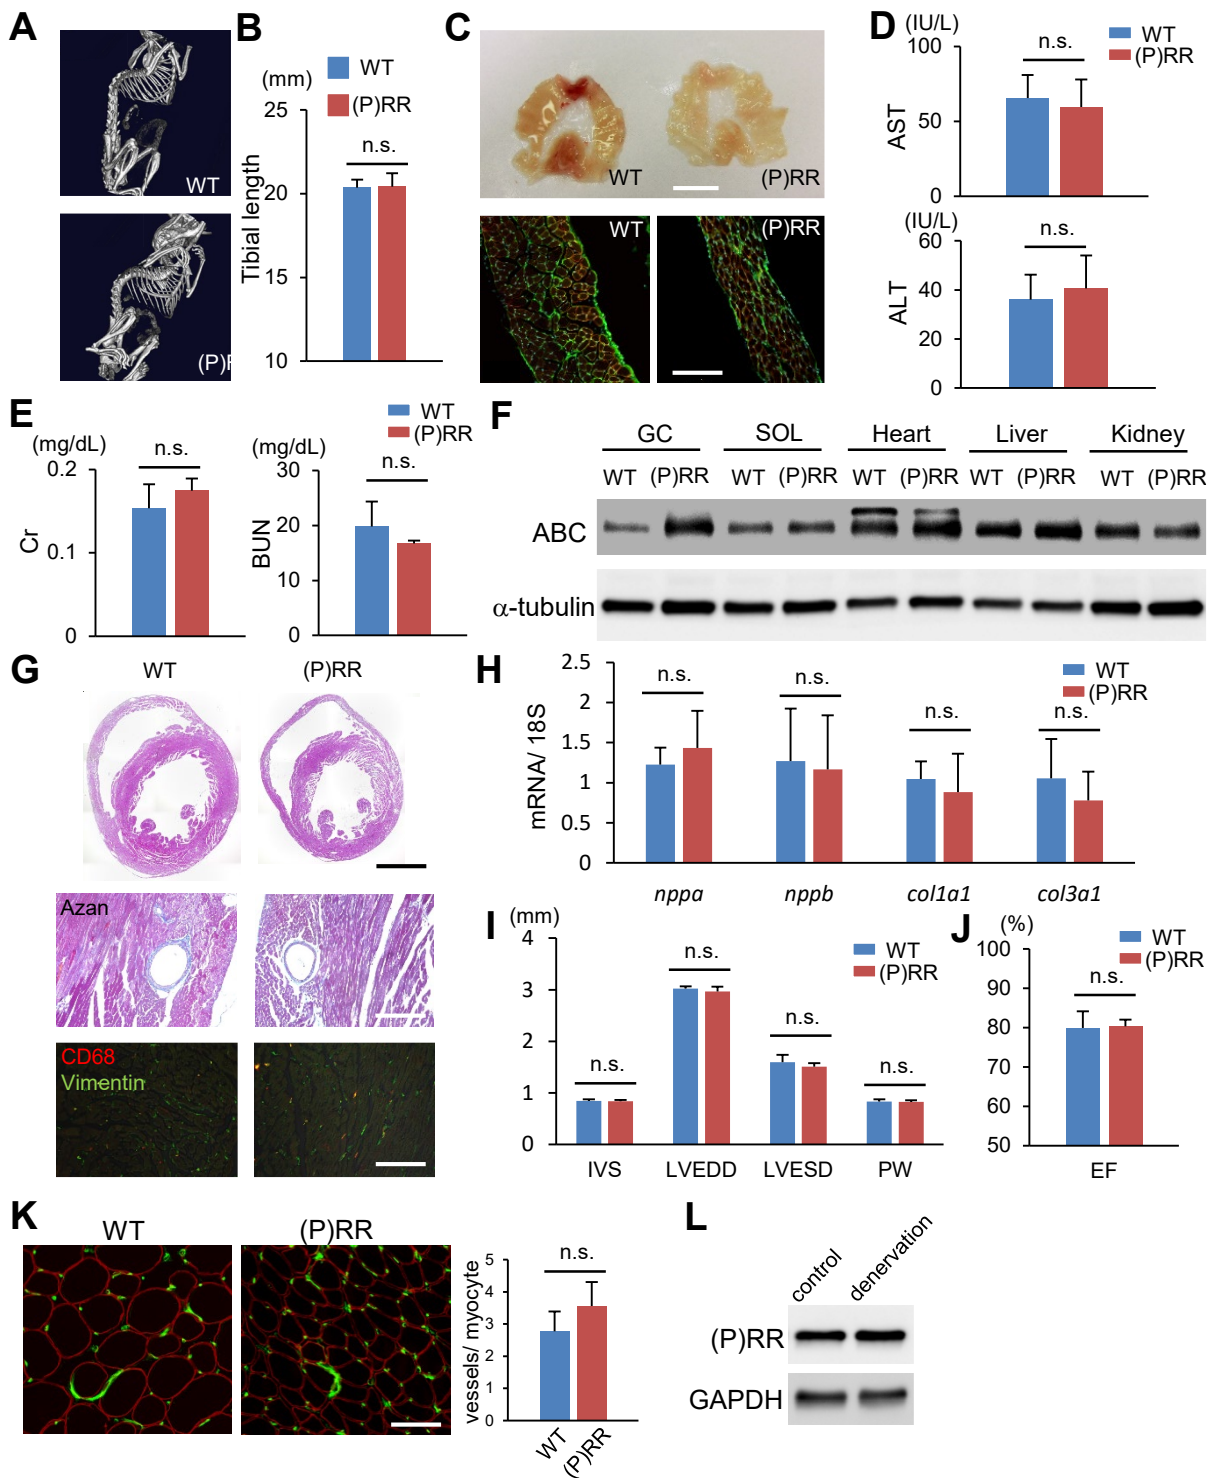

# Supporting Information Figure S2

**A**

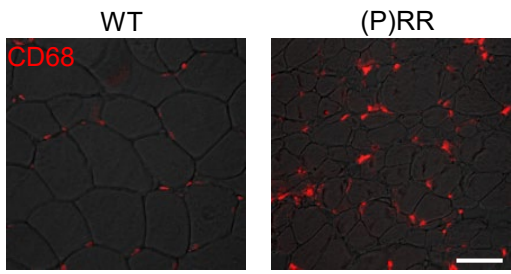

**B**

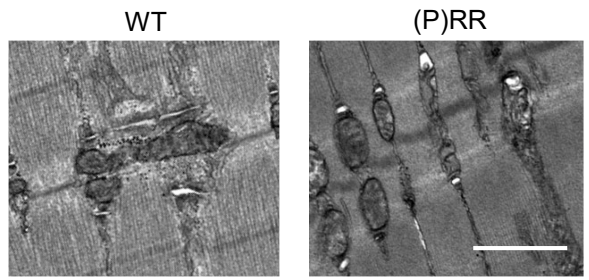

# Supporting Information Figure S3

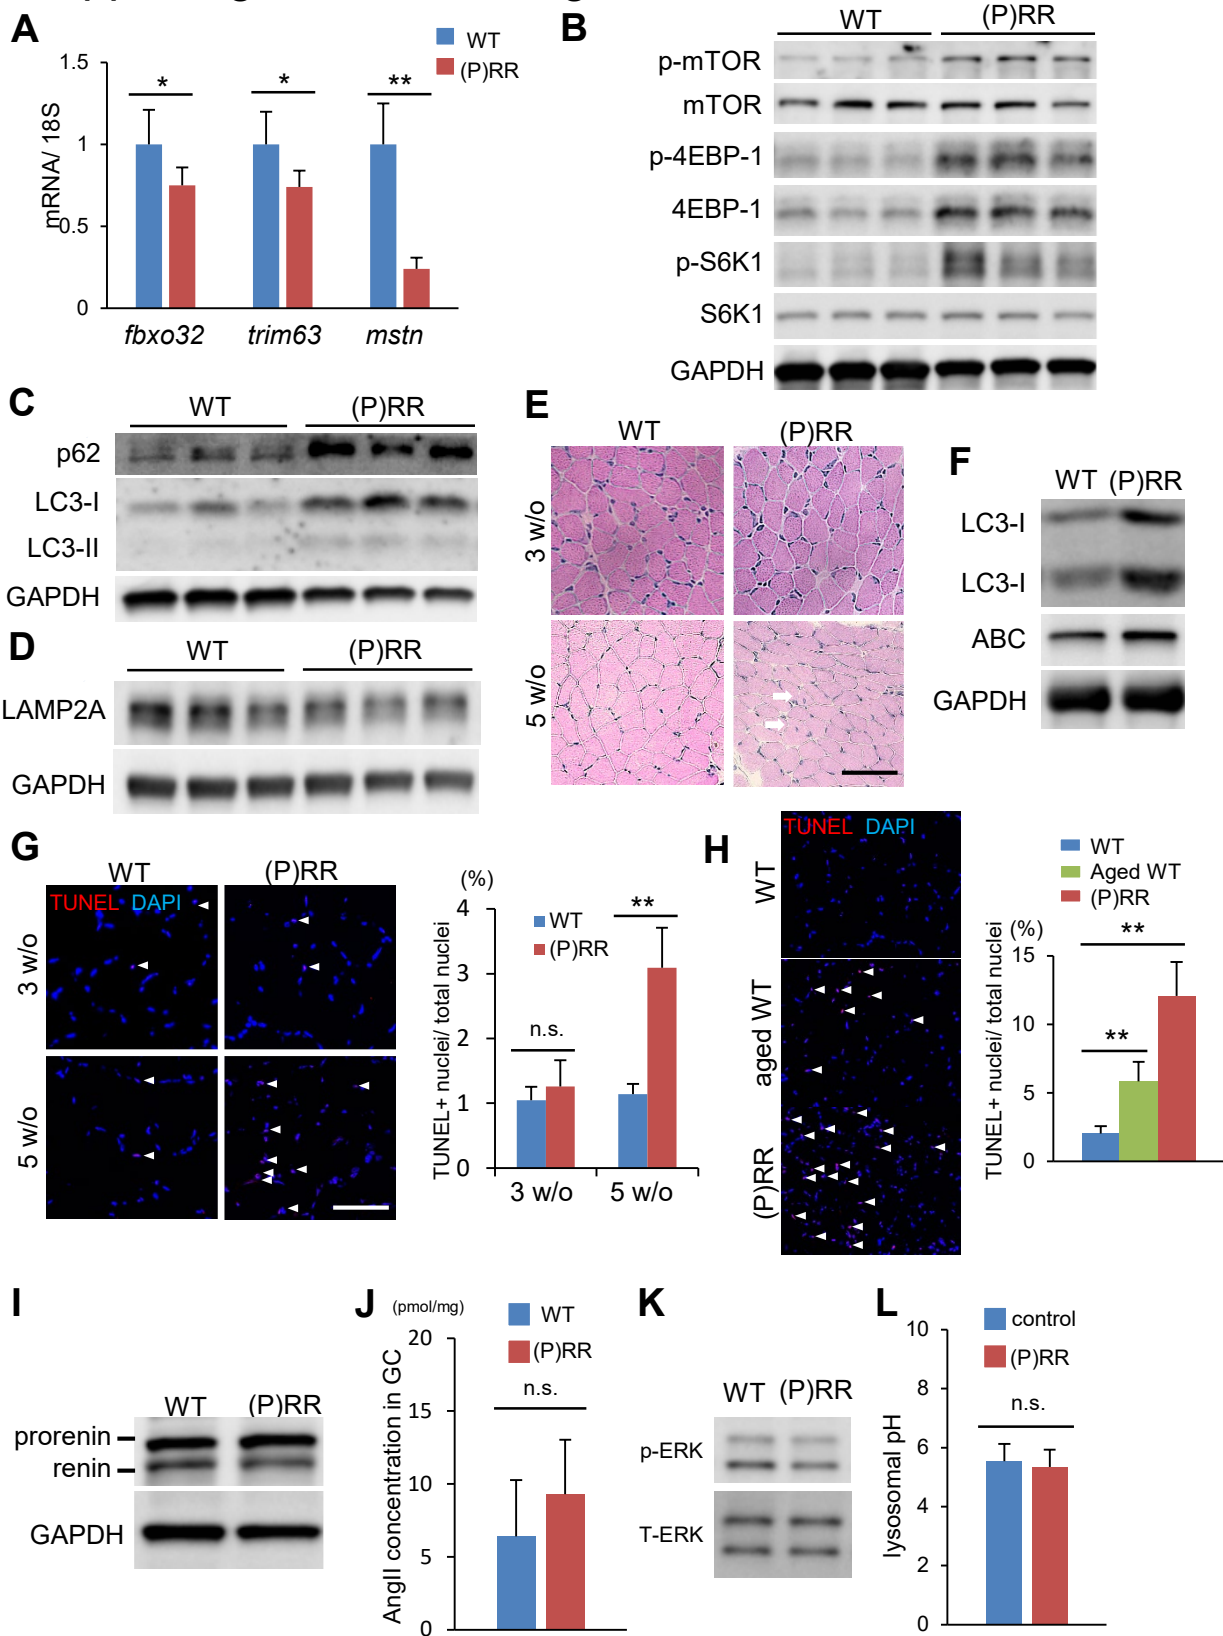

# Supporting Information Figure S4

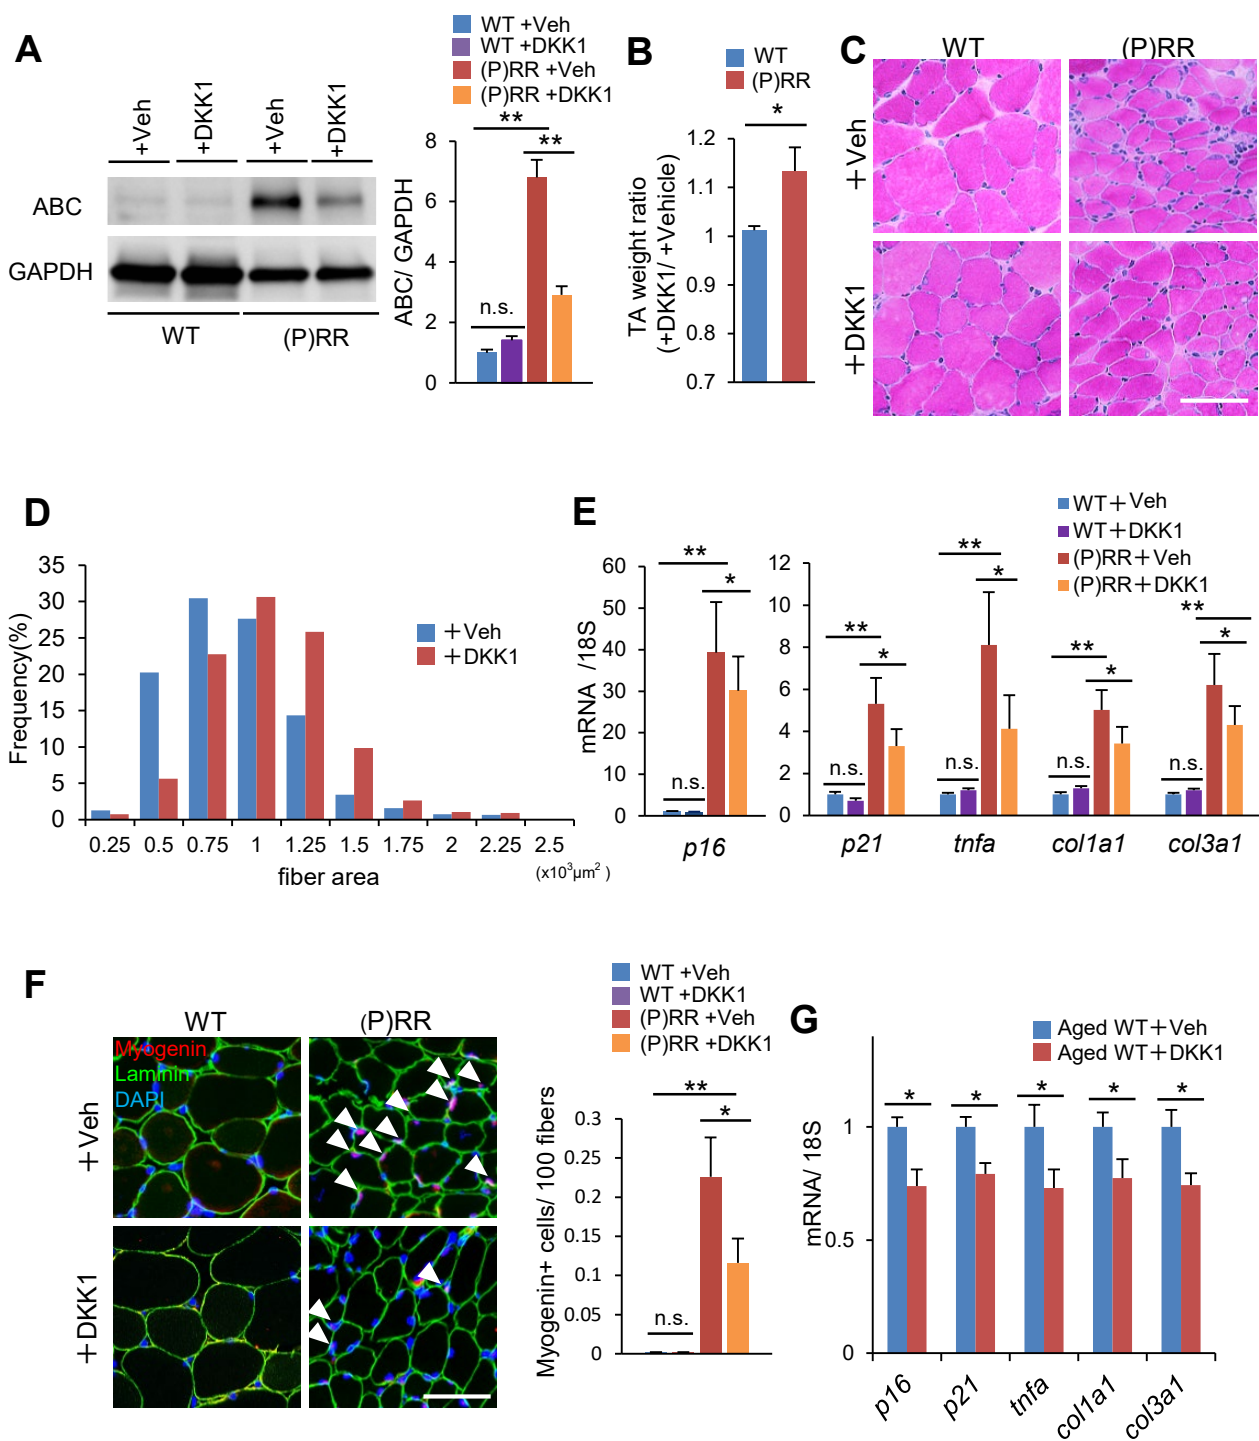

# Supporting Information Figure S5

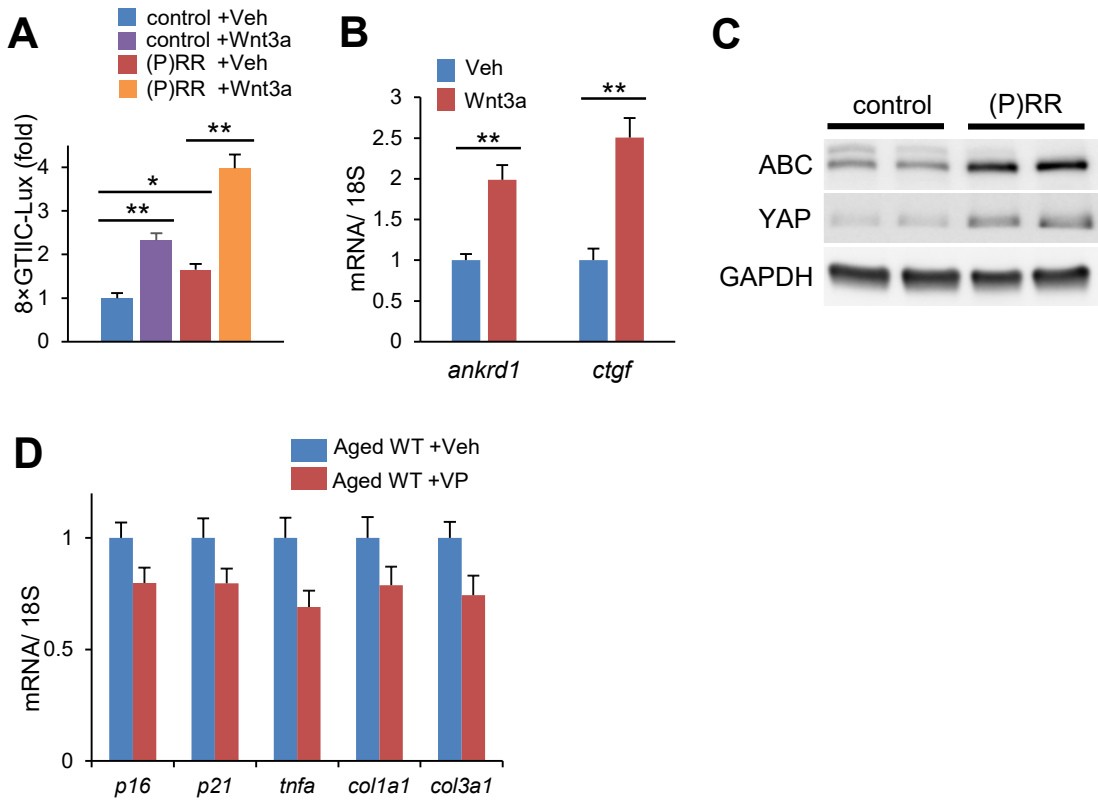

Supplement: ACEL-18-e12991-s001.pdf [file ACEL-18-e12991-s001.pdf]
